# Supplementary material for: MiR-942-5p inhibits tumor migration and invasion through targeting CST1 in esophageal squamous cell carcinoma
Source: PubMed Central journal article supplement (PMC9970063; doi:10.1371/journal.pone.0277006), 2023-02-27

Fig 3A

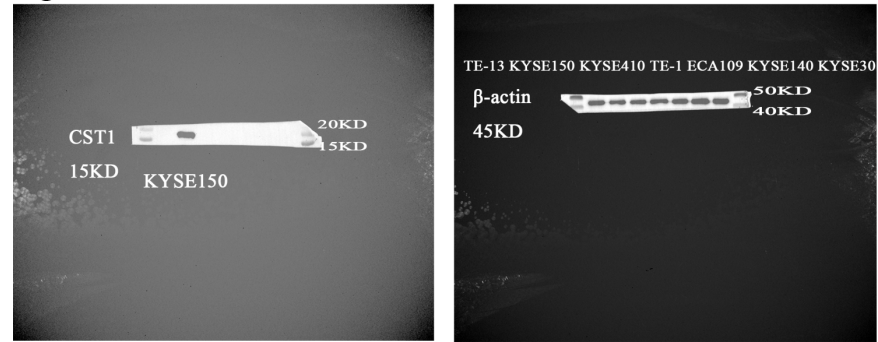

Fig 3B

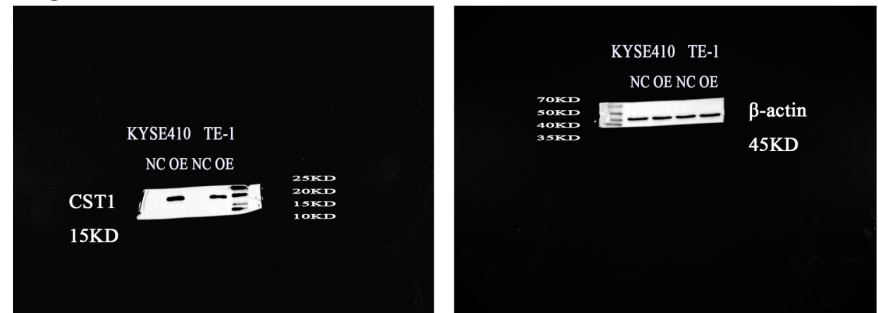

Fig 3B

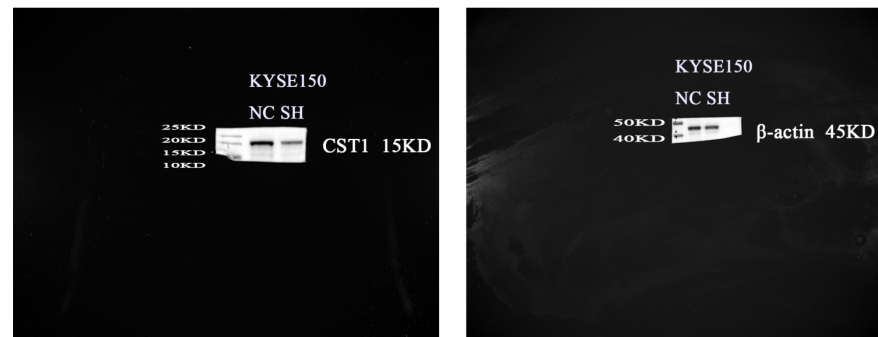

Fig 4C

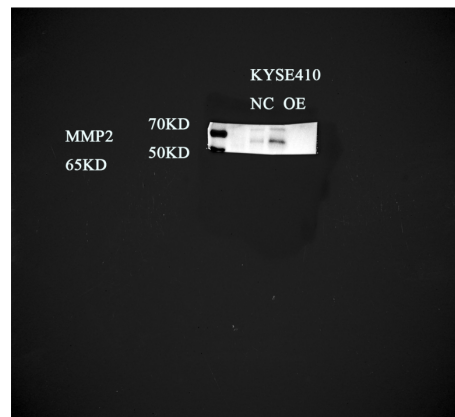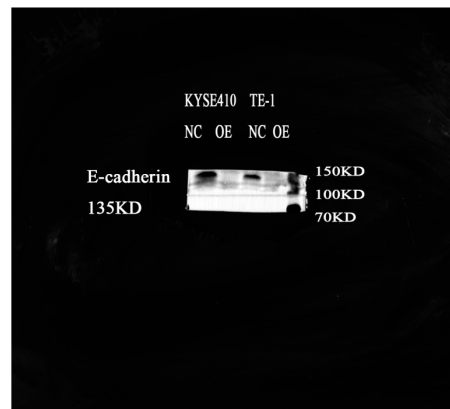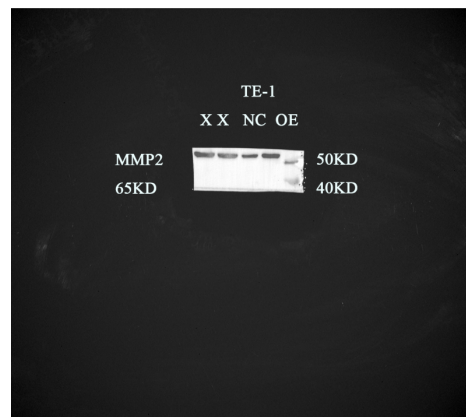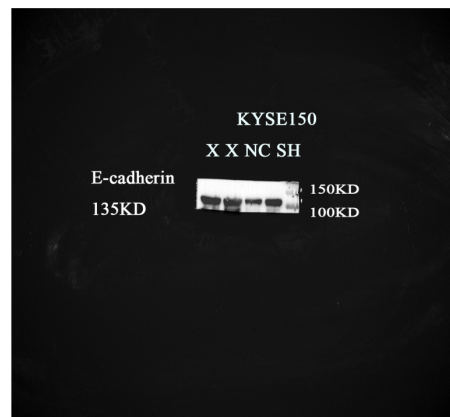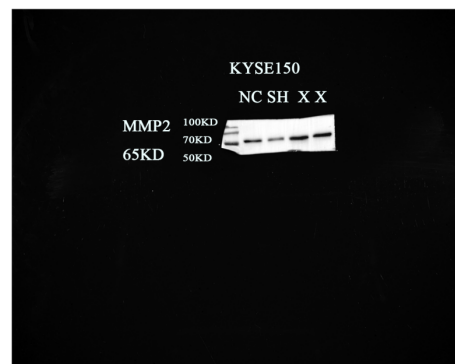

Fig 4C

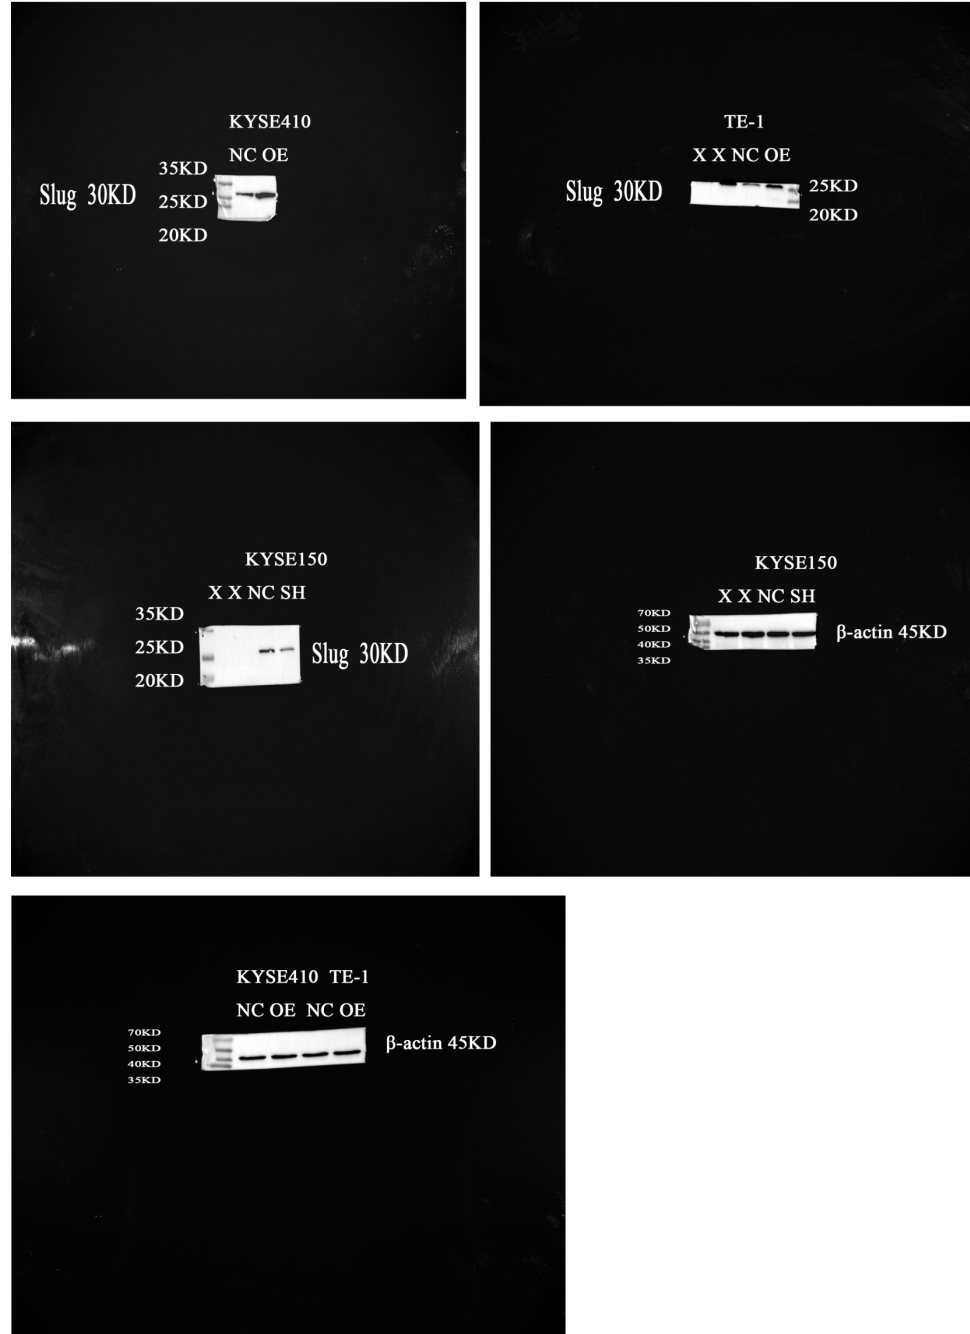

Fig 5A

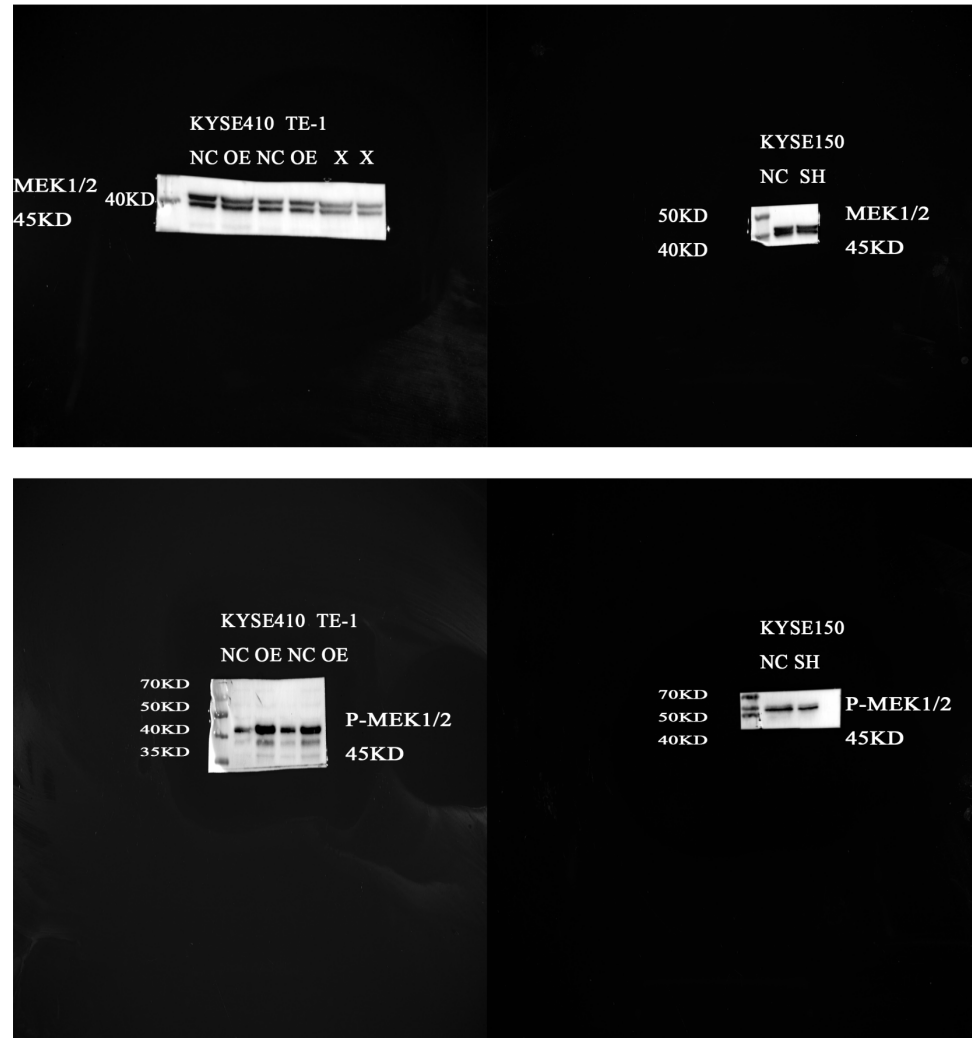

Fig 5A

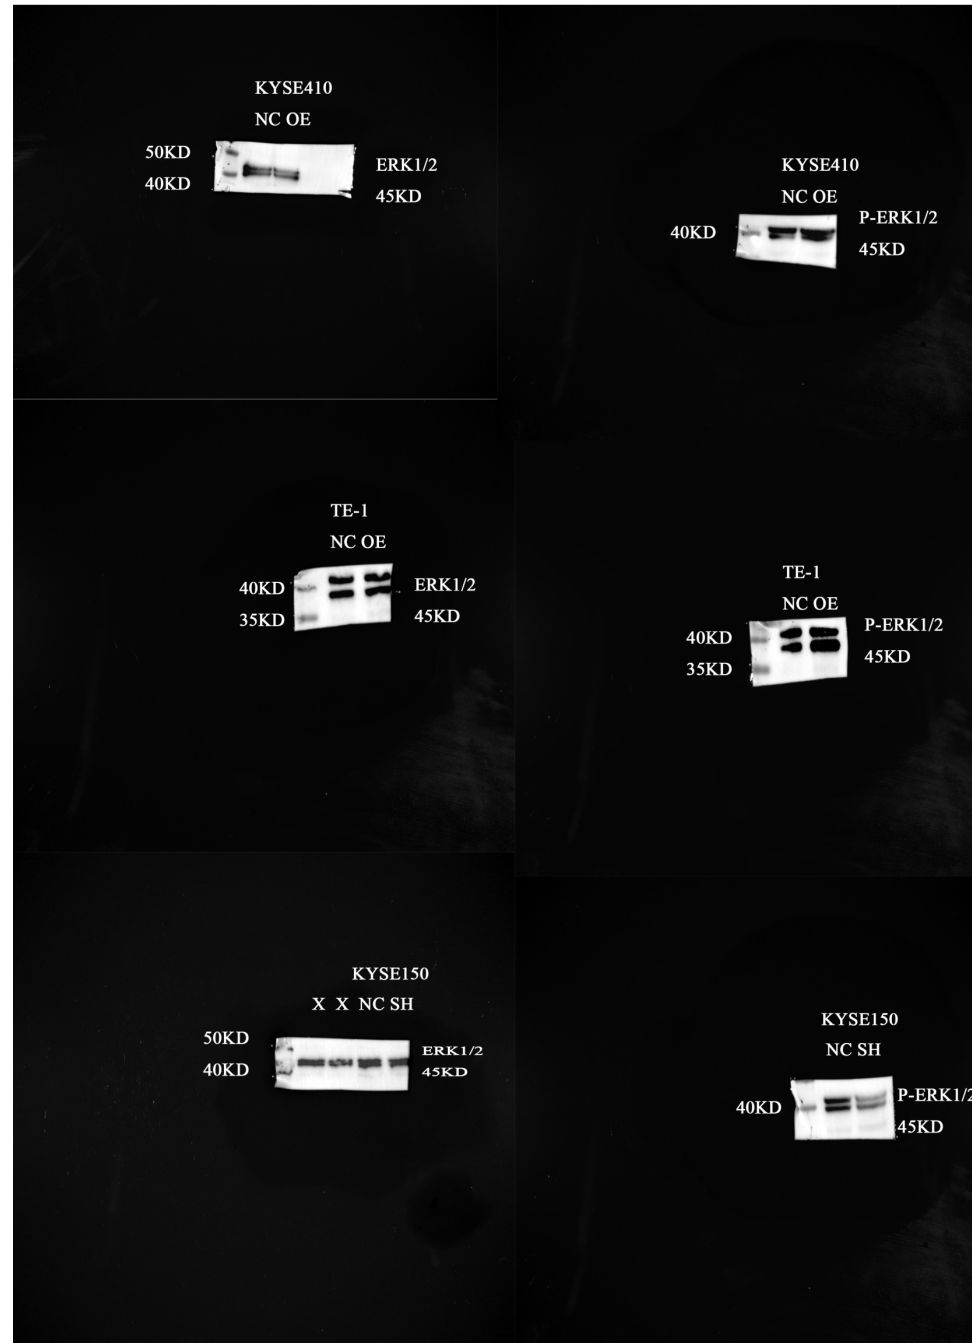

Fig 5A

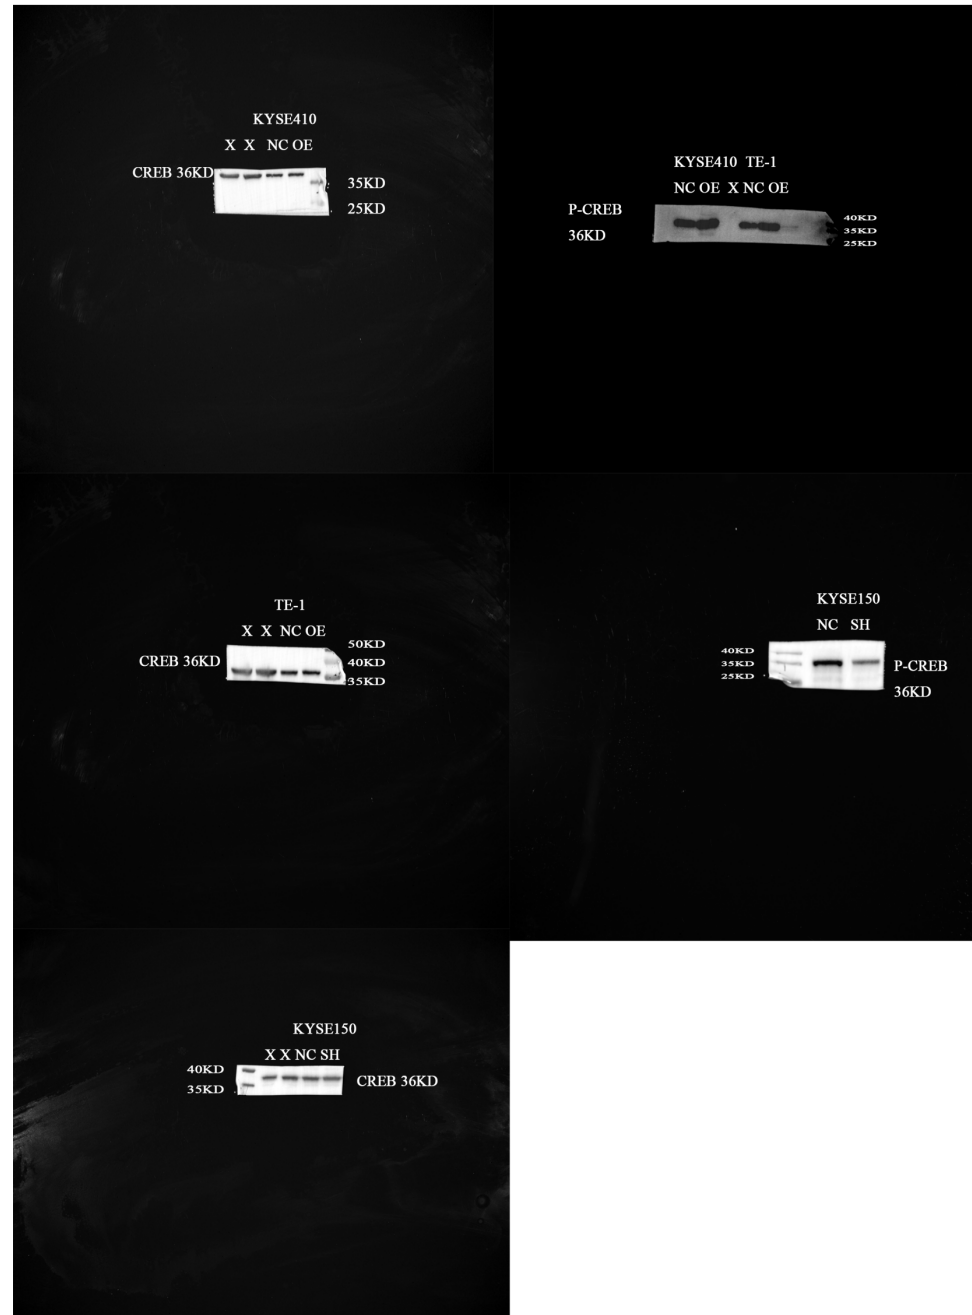

Fig 5A

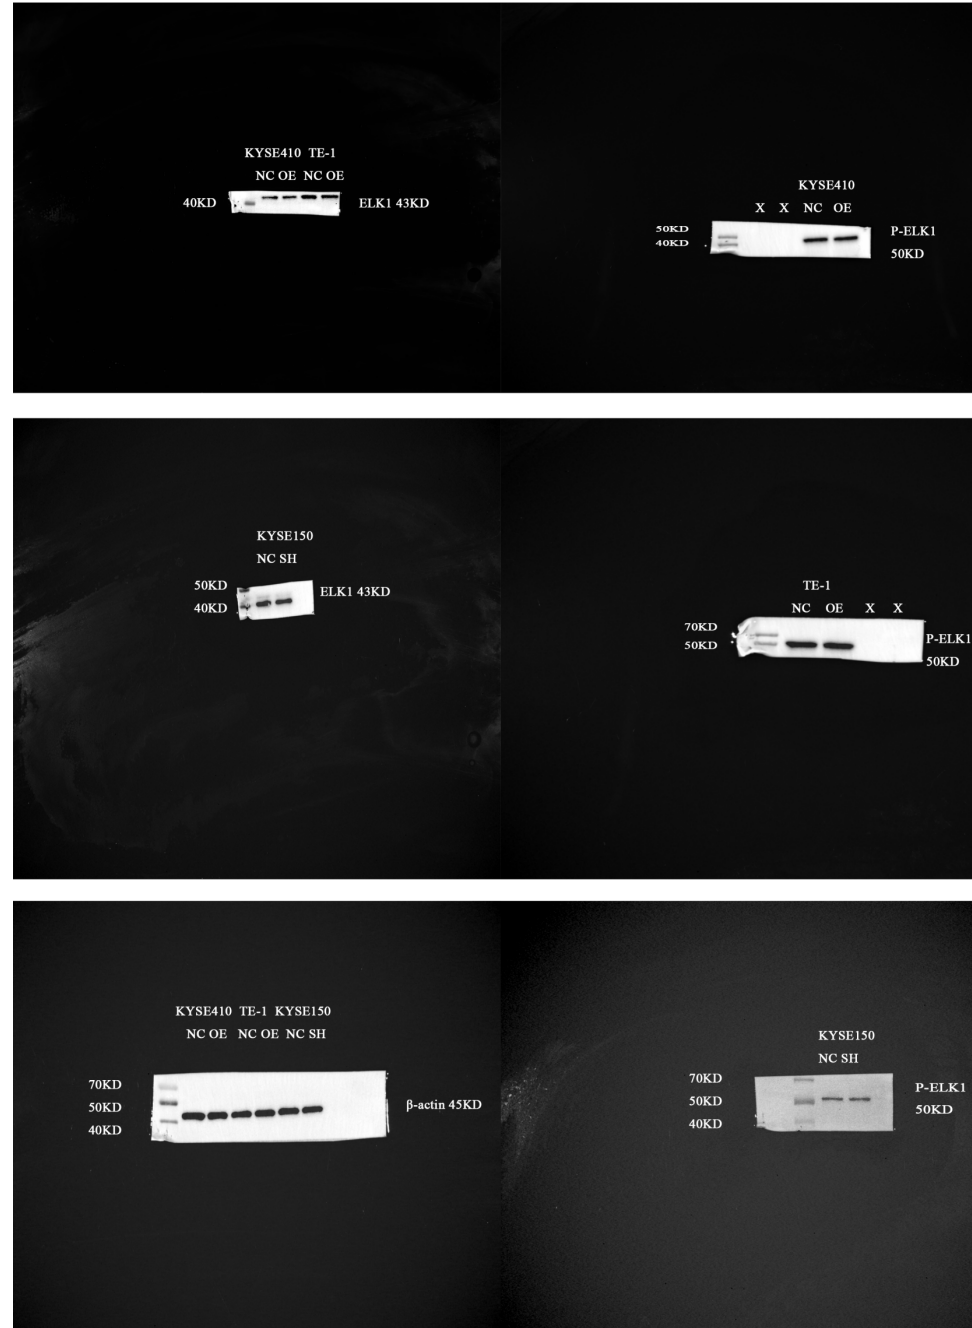

Fig 5B

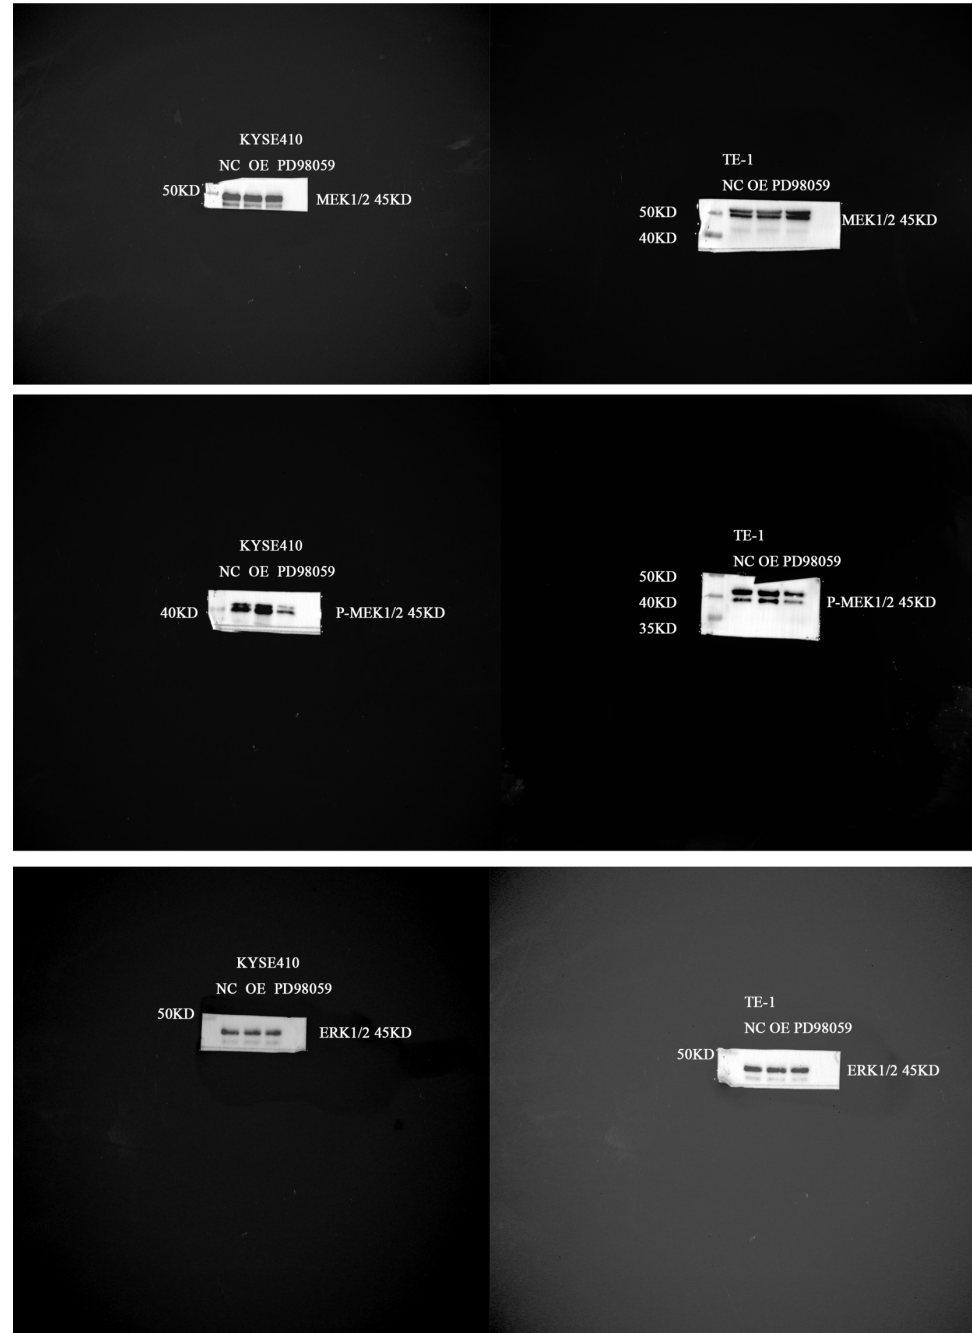



Fig 5B

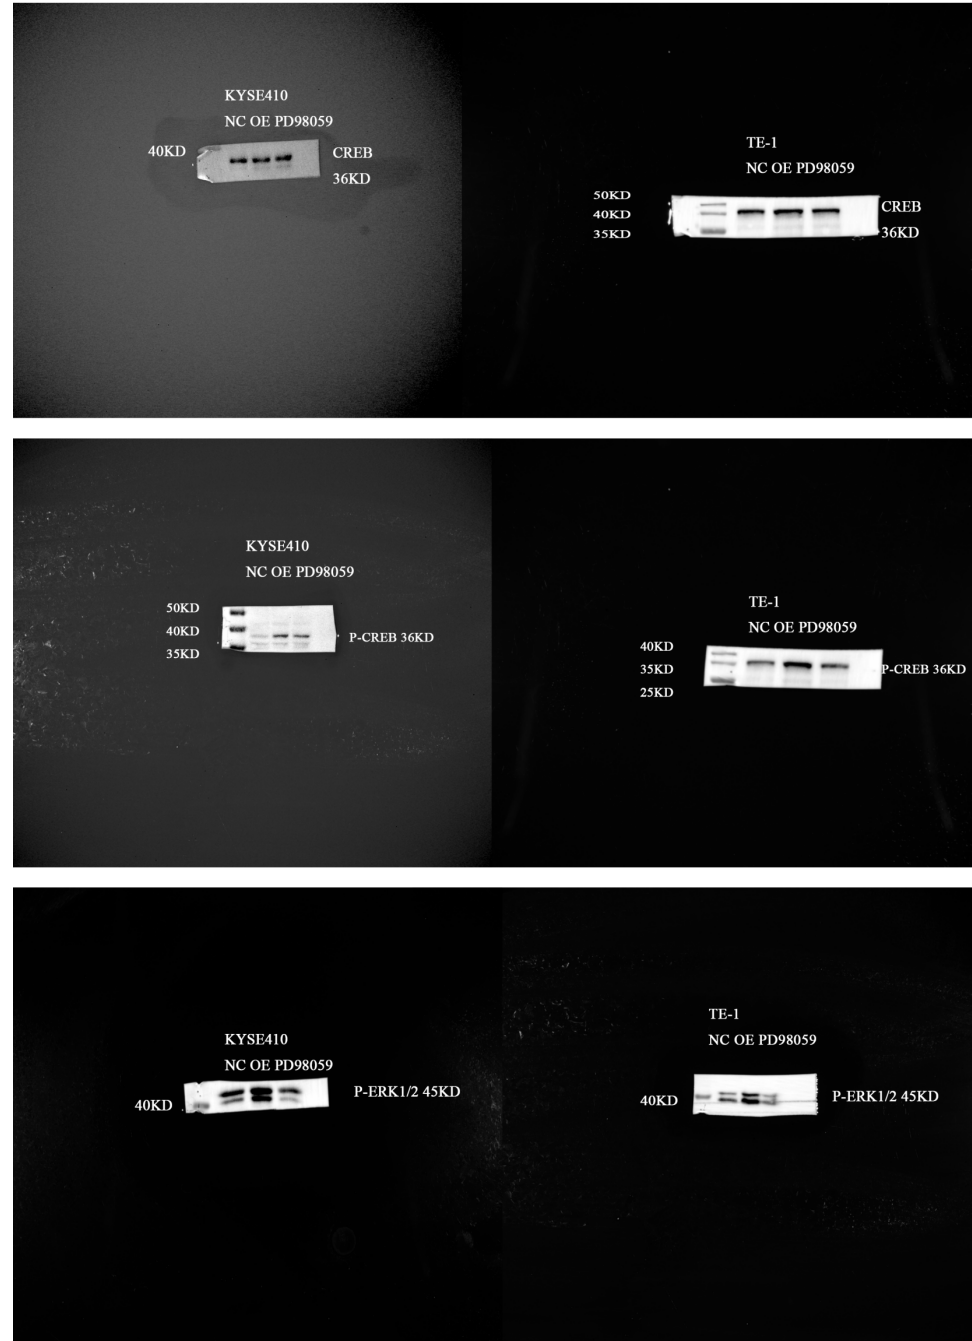

Fig 5B

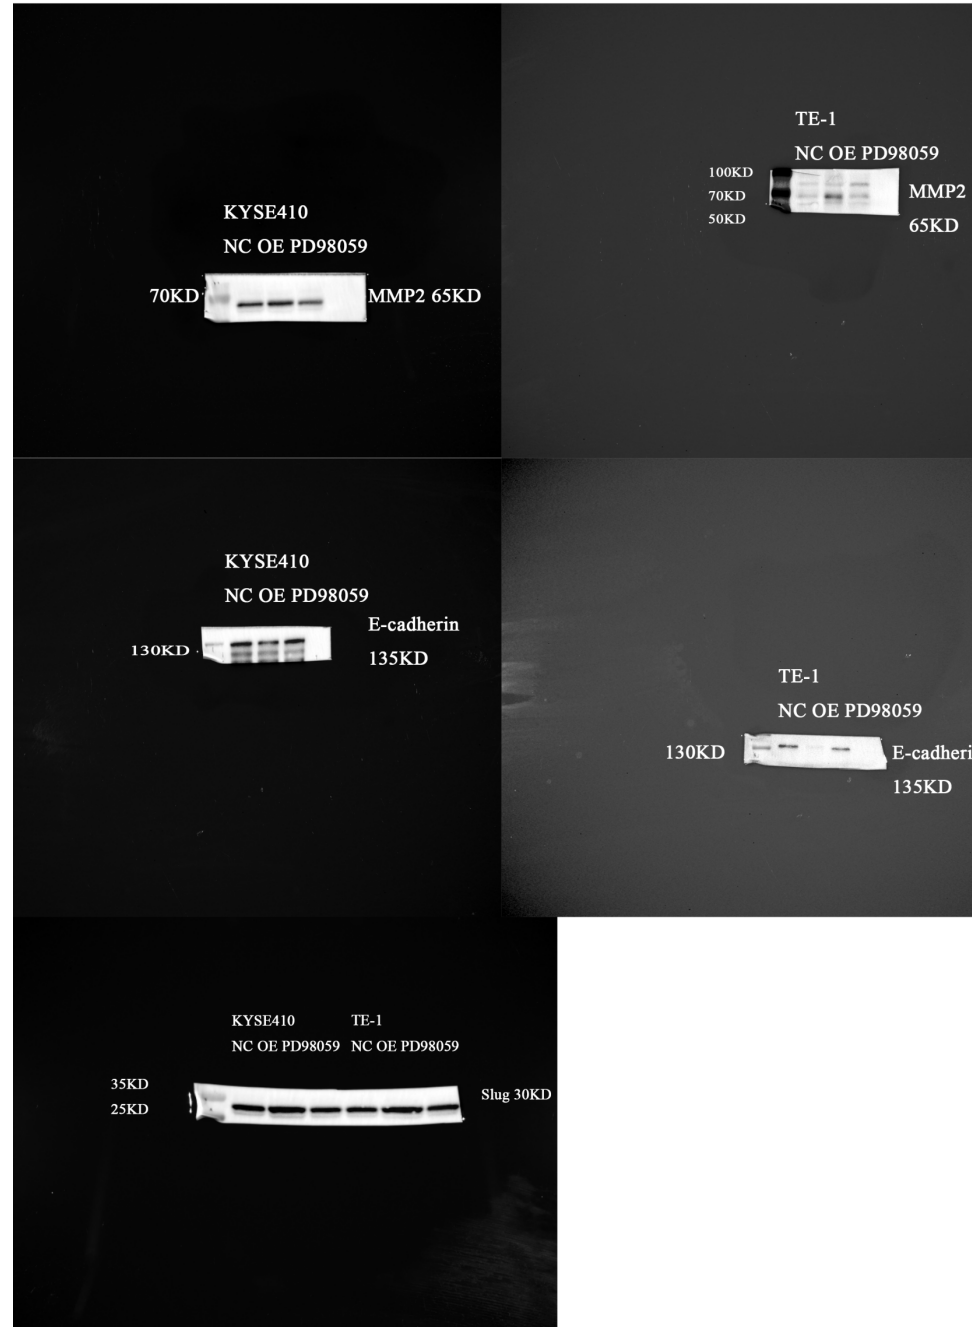

Fig 5B

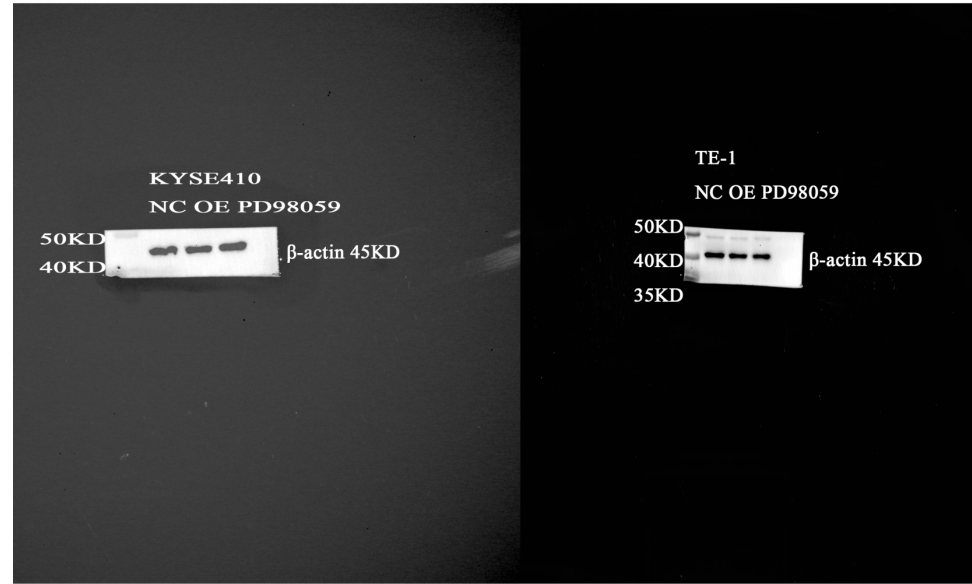

Fig 6E

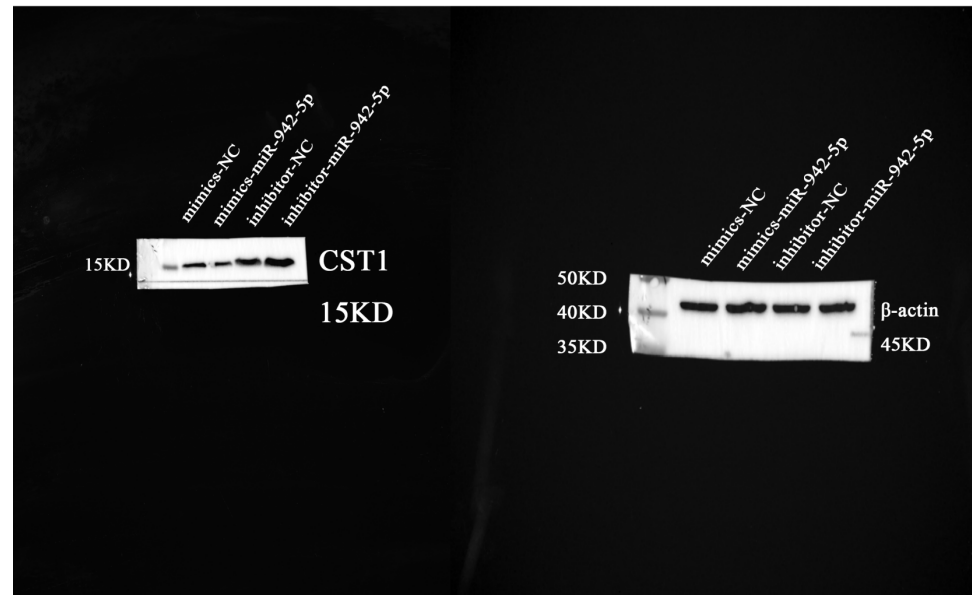

Supplement: pone.0277006.s001.pdf [file pone.0277006.s001.pdf]
